# Supplementary material for: Patterns of Restricted and Repetitive Behaviors in Autism Spectrum Disorders: A Cross-Sectional Video Recording Study. Preliminary Report
Source: MDPI journal article supplement (doi:10.3390/brainsci11060678), 2021-05-21
Supplement: s1 [file s1]

**Supplementary Table S1. Example of restricted and repetitive behaviors across the four domains.**

|                                                                                                                                                                 |
|-----------------------------------------------------------------------------------------------------------------------------------------------------------------|
| <b>M1 - Simple Motor: behavior consisting of one movement</b>                                                                                                   |
| Finger tapping                                                                                                                                                  |
| Finger drumming                                                                                                                                                 |
| Hand waving                                                                                                                                                     |
| Repetitive limb movements: either hand or arm flapping/waving                                                                                                   |
| Body rocking                                                                                                                                                    |
| Hair twisting                                                                                                                                                   |
| Regular, rhythmic, head movements: e.g., an up-and-down “yes” movement, a side-to-side “no” movement, head nodding, head banging, shoulder-to-shoulder movement |
| Mouth opening and closing                                                                                                                                       |
| Facial grimacing                                                                                                                                                |
| Eye blinking                                                                                                                                                    |
| <b>M2 - Complex Motor: behavior consisting of repeated sequences of movements in several body districts</b>                                                     |
| Toe walking, jumping while walking, or running                                                                                                                  |
| Arms flapping, and flexion and extension of the wrist while running                                                                                             |
| Arm swinging while running                                                                                                                                      |
| Moving the upper limbs (waving) while either running or jumping                                                                                                 |
| Skipping or hopping while walking                                                                                                                               |
| Teeth Chattering while leg shaking or kicking                                                                                                                   |
| Clapping hands while body rocking                                                                                                                               |
| Regular, rhythmic, head movements while either arm flapping or waving                                                                                           |
| <b>S1 - Simple Sensory: involves a single sensorial aspect</b>                                                                                                  |
| Touching an object or a surface                                                                                                                                 |
| Licking body parts or objects                                                                                                                                   |
| Hand-sniffing                                                                                                                                                   |
| Hearing the sound produced by an object                                                                                                                         |
| Facing rubbing glass windows                                                                                                                                    |

Rubbing or touching the ear  
Ears closing/plugging with hands  
Biting hand

---

**S2 - Complex Sensory: involves different sensory channels**

---

Grasping small non-food items from the floor and putting them in the mouth  
Body rocking while biting the hand  
Touching and smelling the hairs  
Touching and smelling the hand  
Putting the hand in the mouth while licking and smelling it  
Looking and listening to a sound object  
Ears closing/plugging with hands while touching lips

---

**V1 - Simple Vocal: repeated simple vocalizations or “noises,” acontextual sounds**

---

Vocal remitting grunt  
Raspberries made by bilabial trill produced by lips  
Babbling  
Clearing throat  
Blowing

---

**V2 - Complex Vocal: repeating words phonemes, acontextual or nonfunctional speech/words**

---

Echolalia  
Coprolalia  
Repeating phrases unrelated to the present situation

---

**Intellective: rigid, repetitive, stereotyped behaviors that express a need for routine, resistance to change, and a tendency to maintain environmental immutability. The Intellective domain was further divided between simple (I1) and complex behaviors (I2)**

---

I1 - Simple Intellective: simple rituals of rigid and repetitive behaviors that express a need for routine and resistance to change

---

Arranging objects in a specific order or pattern  
Crumbling the food before eating it  
Arranging the glass in the same place

Keeping the door of the cupboard open in the same position

Walking up the stairs two steps at the time

Pencil sharpening

Picking at finger nails and cuticles

Refusing to walk on specific ground (e.g., grass)

---

I2 - Complex Intellective: complex ritual from the point of view of the reiterated behavioral sequence

---

Trashing items while following the same route

Walking, turning around, and stopping.

Pacing and walking in circles

Coughing while either hand or arm flapping/waving

Keeping the cabinet door open and moving the door slightly to hear the noise

Walking in circles before sitting.

Insistence of walking on the same route before entering a room

Insistence on turning in a circle times before entering a room

Aligning shoes before wearing shoes

---
